# Supplementary material for: Effects of Drug Physicochemical Properties on In-Situ Forming Implant Polymer Degradation and Drug Release Kinetics
Source: MDPI journal article supplement (doi:10.3390/pharmaceutics14061188), 2022-06-01
Supplement: s1 [file s1]

Supplementary Information

# Effects of Drug Physicochemical Properties on In-Situ Forming Implant Polymer Degradation and Drug Release Kinetics

Jordan B. Joiner <sup>1,†</sup>, Alka Prasher <sup>2,†</sup>, Isabella C. Young <sup>1</sup>, Jessie Kim <sup>3</sup>, Roopali Shrivastava <sup>2</sup>, Panita Maturavongsadit <sup>1</sup> and Soumya Rahima Benhabbour <sup>1,2,\*</sup>

<sup>1</sup> Division of Pharmacoengineering and Molecular Pharmaceutics, Eshelman School of Pharmacy, University of North Carolina at Chapel Hill, Chapel Hill, NC 27599, USA; jbjoiner@unc.edu (J.B.J.); iyoung4@live.unc.edu (I.C.Y.); panita@med.unc.edu (P.M.)

<sup>2</sup> Joint Department of Biomedical Engineering, University of North Carolina and North Carolina State University, Chapel Hill, NC 27599, USA; alkaprasher@gmail.com (A.P.); roopalis@email.unc.edu (R.S.)

<sup>3</sup> Eshelman School of Pharmacy, University of North Carolina at Chapel Hill, Chapel Hill, NC 27599, USA; jessiek@alumni.unc.edu

\* Correspondence: benhabbs@email.unc.edu

† These authors contributed equally to this work.

**Citation:** Lastname, F.; Lastname, F.; Lastname, F. Title. *Pharmaceutics* **2022**, *14*, 1188.  
<https://doi.org/10.3390/pharmaceutics14061188>

Academic Editor: Firstname Lastname

Received: date

Accepted: date

Published: 1 June 2022

**Publisher's Note:** MDPI stays neutral with regard to jurisdictional claims in published maps and institutional affiliations.

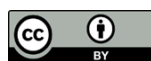

**Copyright:** © 2022 by the authors. Licensee MDPI, Basel, Switzerland. This article is an open access article distributed under the terms and conditions of the Creative Commons Attribution (CC BY) license (<https://creativecommons.org/licenses/by/4.0/>).

**Supplementary Table S1.** Summary of various ISFI formulations investigated to study the effects of drug physicochemical properties on drug release kinetics and polymer degradation over 90 days incubation in PBS at 37°C. Drug concentration in ISFI formulations (mg/g) and in each depot (mg) injected into PBS was determined by HPLC analysis.

| Drug | LogP  | pKa  | [drug] (mg/g) | Drug/depot (mg) |
|------|-------|------|---------------|-----------------|
| DRV  | 1.8   | 11.4 | 49.52 ± 2.78  | 1.28 ± 0.13     |
| DTG  | 2.2   | 8.2  | 51.90 ± 5.1   | 1.21 ± 0.08     |
| RTV  | 3.9   | 2.8  | 49.26 ± 3.71  | 1.51 ± 0.09     |
| EFV  | 4.6   | 10.2 | 53.73 ± 3.96  | 1.72 ± 0.16     |
| RPV  | 4.8   | 5.6  | 51.35 ± 3.04  | 1.73 ± 0.14     |
| ETV  | 5.5   | 3.7  | 50.98 ± 1.87  | 1.60 ± 0.01     |
| GEM  | -1.4  | 3.4  | 50.10 ± 2.36  | 1.46 ± 0.04     |
| 3TC  | -0.49 | 4.3  | 50.48 ± 3.18  | 1.57 ± 0.09     |
| 5FU  | -0.89 | 8.02 | 51.77 ± 3.29  | 1.72 ± 0.13     |
| RAL  | -0.39 | 6.3  | 51.81 ± 2.79  | 1.61 ± 0.20     |
| ZDV  | 0.05  | 9.7  | 53.44 ± 2.24  | 1.77 ± 0.15     |
| IDA  | 0.2   | 9.5  | 51.20 ± 1.41  | 1.78 ± 0.08     |

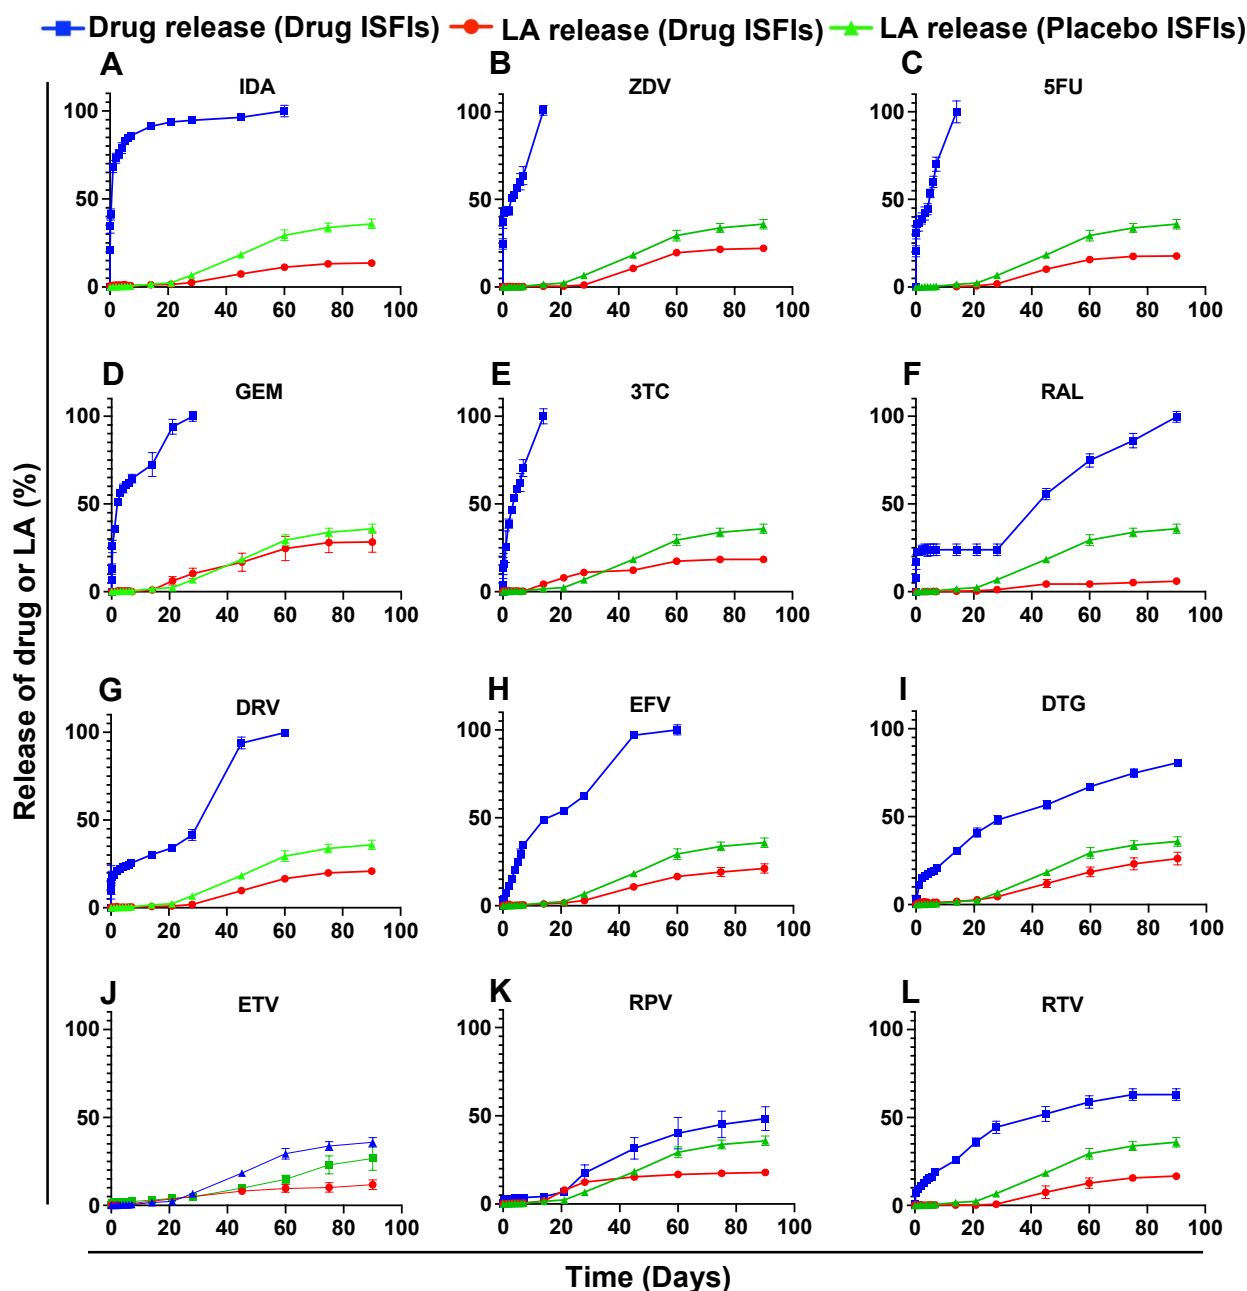

**Supplementary Figure S1:** In vitro drug release kinetics and PLGA degradation quantified by HPLC and lactic acid assay respectively over 90 days. % Drug release (blue), lactic acid release from drug-loaded ISFIs (red), and lactic acid release from placebo ISFIs (green). A) IDA ISFI (50 mg/g); B) ZDV ISFI (50 mg/g); C) 5FU ISFI (50 mg/g); D) GEM ISFI (50 mg/g); E) 3TC ISFI (50 mg/g); F) RAL ISFI (50 mg/g); G) DRV ISFI (50 mg/g); H) EFV ISFI (50 mg/g); I) DTG ISFI (50 mg/g); J) ETV ISFI (50 mg/g); K) RPV ISFI (50 mg/g); L) RTV ISFI (50 mg/g).

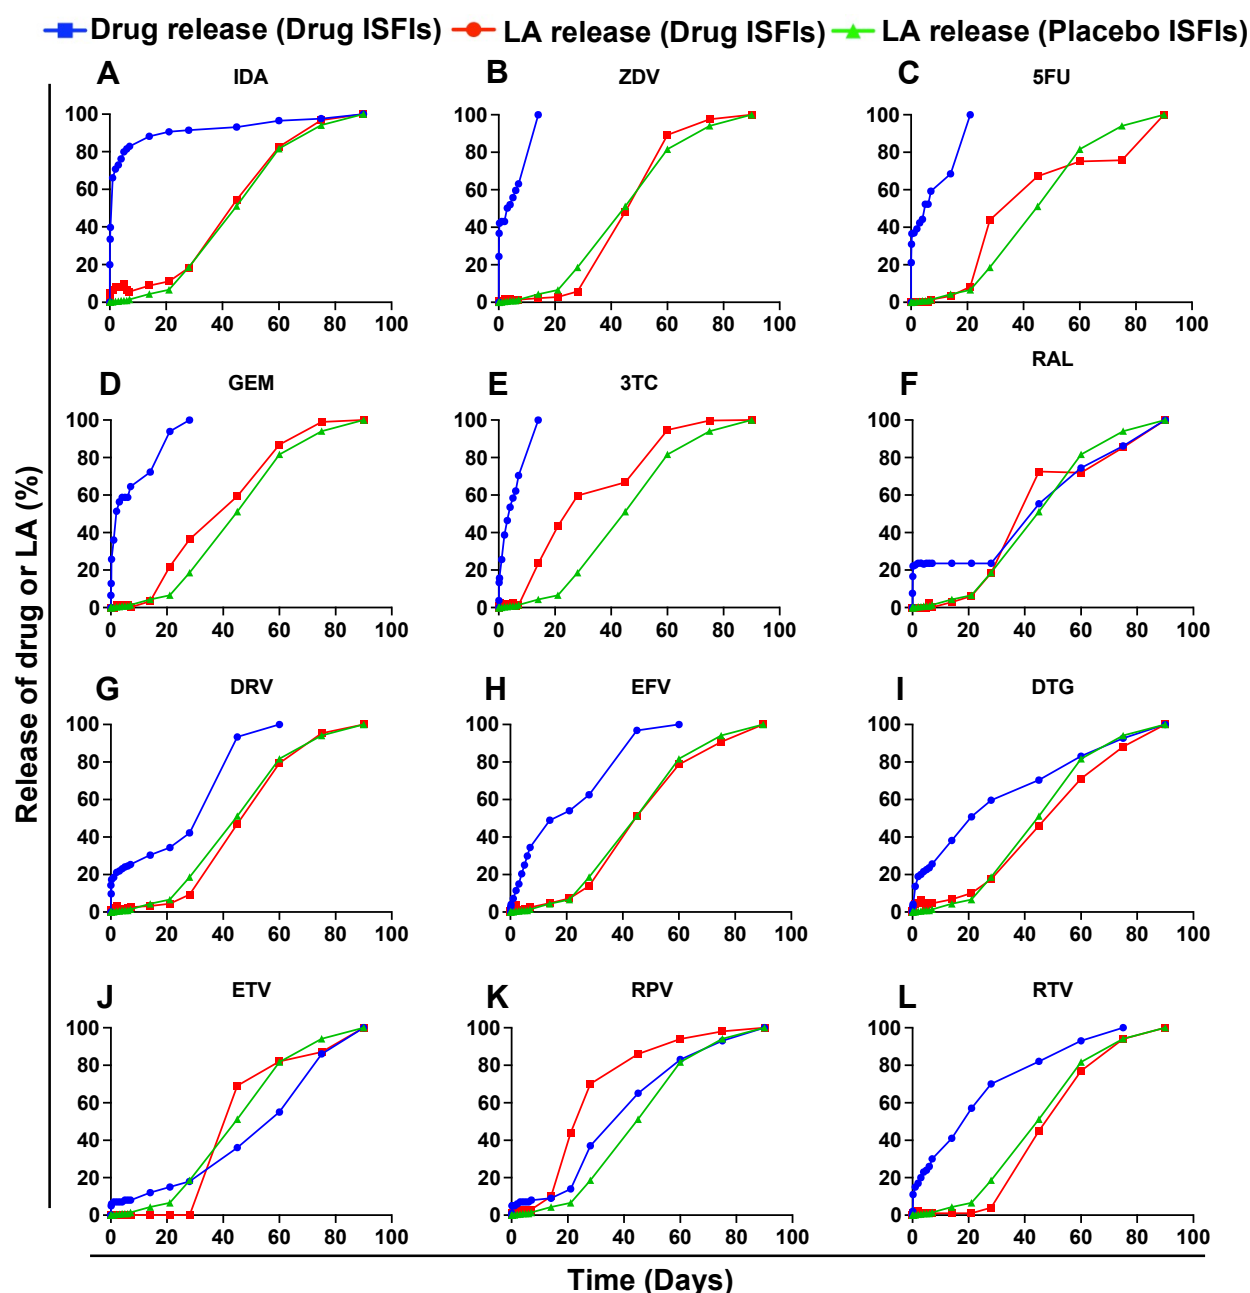

**Supplementary Figure S2:** In vitro drug release kinetics and PLGA degradation quantified by HPLC and lactic acid assay respectively over 90 days. Drug release normalized to % release at day 90 (blue), lactic acid release from drug-loaded ISFIs normalized to % release at day 90 (red), and lactic acid release from placebo ISFI normalized to % release at day 90 (green). A) IDA ISFI (50 mg/g); B) ZDV ISFI (50 mg/g); C) 5FU ISFI (50 mg/g); D) GEM ISFI (50 mg/g); E) 3TC ISFI (50 mg/g); F) RAL ISFI (50 mg/g); G) DRV ISFI (50 mg/g); H) EFV ISFI (50 mg/g); I) DTG ISFI (50 mg/g); J) ETV ISFI 50 (mg/g); K) RPV ISFI (50 mg/g); L) RTV ISFI (50 mg/g).

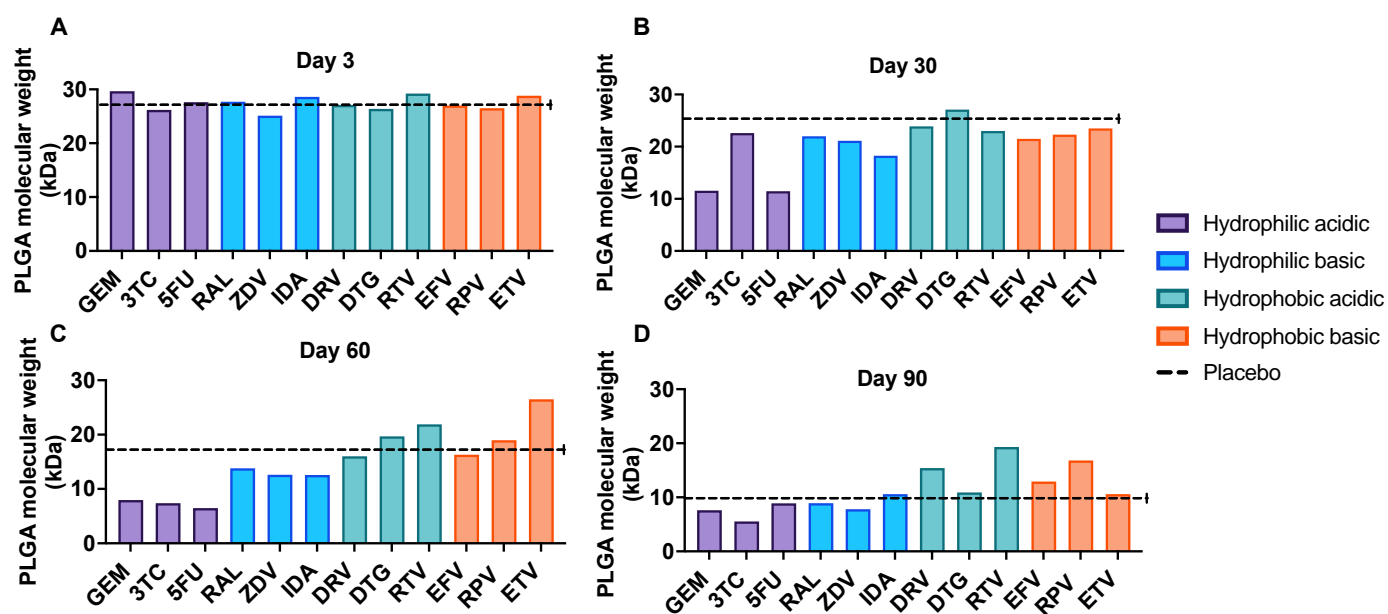

**Supplementary Figure S3:** Molecular weight of PLGA (kDa) as measured by GPC analysis for each drug at (A) day 3 (B) day 30 (C) day 60 (D) day 90.
